# Supplementary material
Source: Springer Nature journal article supplement (https://www.springermedizin.de/resource/supplementary/12931_2013_1406_MOESM5_ESM.pdf/9426192)

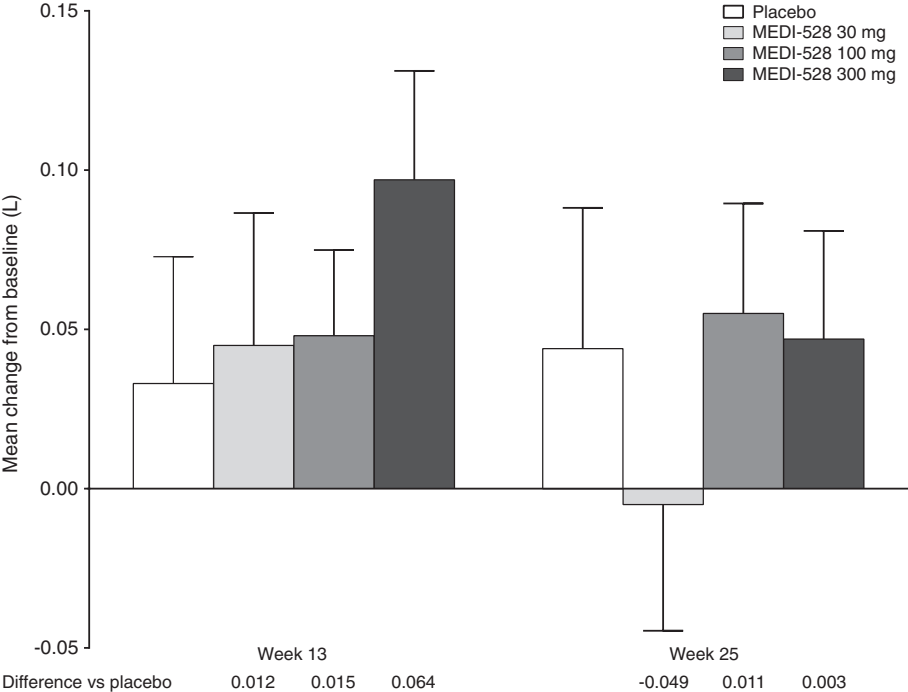

Supplement: MOESM5 [file 9426192]
